# Supplementary material
Source: ML conference proceedings conference paper supplement (https://openaccess.thecvf.com/content/ICCV_2017/html/Cao_HashNet_Deep_Learning_ICCV_2017_paper.html)
Supplement: Supplementary file 1 [file Cao_HashNet_Deep_Learning_ICCV_2017_supplemental.pdf]

# Supplemental Material: HashNet: Deep Learning to Hash by Continuation

Zhangjie Cao<sup>†</sup>, Mingsheng Long<sup>†</sup>, Jianmin Wang<sup>†</sup>, and Philip S. Yu<sup>‡</sup>

<sup>†</sup>KLiss, MOE; NEL-BDS; TNList; School of Software, Tsinghua University, China

<sup>‡</sup>University of Illinois at Chicago, IL, USA

caozhangjie14@gmail.com {mingsheng, jimwang}@tsinghua.edu.cn psyu@uic.edu

## 1. Convergence Analysis

We briefly analyze that the continuation optimization in Algorithm 1 will decrease the loss of HashNet (4) in each stage and in each iteration until converging to HashNet with sign activation function that generates *exactly* binary codes.

Let  $L_{ij} = w_{ij} (\log(1 + \exp(\alpha \langle \mathbf{h}_i, \mathbf{h}_j \rangle)) - \alpha s_{ij} \langle \mathbf{h}_i, \mathbf{h}_j \rangle)$  and  $L = \sum_{s_{ij} \in \mathcal{S}} L_{ij}$ , where  $\mathbf{h}_i \in \{-1, +1\}^K$  are *binary* hash codes. Note that when optimizing HashNet by continuation in Algorithm 1, network activation in each stage  $t$  is  $g = \tanh(\beta_t z)$ , which is *continuous* in nature and will only become *binary* when convergence  $\beta_t \rightarrow \infty$ . Denote by  $J_{ij} = w_{ij} (\log(1 + \exp(\alpha \langle \mathbf{g}_i, \mathbf{g}_j \rangle)) - \alpha s_{ij} \langle \mathbf{g}_i, \mathbf{g}_j \rangle)$  and  $J = \sum_{s_{ij} \in \mathcal{S}} J_{ij}$  the true loss we optimize in Algorithm 1, where  $\mathbf{g}_i \in \mathbb{R}^K$  and note that  $\mathbf{h}_i = \text{sgn}(\mathbf{g}_i)$ . We will show that HashNet loss  $L(\mathbf{h})$  descends when minimizing  $J(\mathbf{g})$ .

**Theorem 1.** *The HashNet loss  $L$  will not change across stages  $t$  and  $t+1$  with bandwidths switched from  $\beta_t$  to  $\beta_{t+1}$ .*

*Proof.* When the algorithm switches from stages  $t$  to  $t+1$  with bandwidths changed from  $\beta_t$  to  $\beta_{t+1}$ , only the network activation is changed from  $\tanh(\beta_t z)$  to  $\tanh(\beta_{t+1} z)$  but its sign  $h = \text{sgn}(\tanh(\beta_t z)) = \text{sgn}(\tanh(\beta_{t+1} z))$ , i.e. the hash code, remains the same. Thus  $L$  is unchanged.  $\square$

For each pair of binary codes  $\mathbf{h}_i, \mathbf{h}_j$  and their continuous counterparts  $\mathbf{g}_i, \mathbf{g}_j$ , the derivative of  $J$  w.r.t. each bit  $k$  is

$$\frac{\partial J}{\partial g_{ik}} = w_{ij} \alpha \left( \frac{1}{1 + \exp(-\alpha \langle \mathbf{g}_i, \mathbf{g}_j \rangle)} - s_{ij} \right) g_{jk}, \quad (1)$$

where  $k = 1, \dots, K$ . The derivative of  $J$  w.r.t.  $\mathbf{g}_j$  can be defined similarly. Updating  $\mathbf{g}_i$  by SGD, the updated  $\mathbf{g}'_i$  is

$$\begin{aligned} g'_{ik} &= g_{ik} - \eta \frac{\partial J}{\partial g_{ik}} \\ &= g_{ik} - \eta w_{ij} \alpha \left( \frac{1}{1 + \exp(-\alpha \langle \mathbf{g}_i, \mathbf{g}_j \rangle)} - s_{ij} \right) g_{jk}, \end{aligned} \quad (2)$$

where  $\eta$  is the learning rate and  $\mathbf{g}'_j$  is computed similarly.

**Lemma 1.** *Denote by  $\mathbf{h}_i = \text{sgn}(\mathbf{g}_i)$ ,  $\mathbf{h}'_i = \text{sgn}(\mathbf{g}'_i)$ , then*

$$\begin{cases} \langle \mathbf{h}'_i, \mathbf{h}'_j \rangle \geq \langle \mathbf{h}_i, \mathbf{h}_j \rangle, & s_{ij} = 1, \\ \langle \mathbf{h}'_i, \mathbf{h}'_j \rangle \leq \langle \mathbf{h}_i, \mathbf{h}_j \rangle, & s_{ij} = 0. \end{cases} \quad (3)$$

*Proof.* Since  $\langle \mathbf{h}_i, \mathbf{h}_j \rangle = \sum_{k=1}^K h_{ik} h_{jk}$ , Lemma 1 can be proved by verifying that  $h'_{ik} h'_{jk} \geq h_{ik} h_{jk}$  if  $s_{ij} = 1$  and  $h'_{ik} h'_{jk} \leq h_{ik} h_{jk}$  if  $s_{ij} = 0, \forall k = 1, 2, \dots, K$ .

**Case 1.**  $s_{ij} = 0$ .

(1) If  $g_{ik} < 0, g_{jk} > 0$ , then  $\frac{\partial J}{\partial g_{ik}} > 0, \frac{\partial J}{\partial g_{jk}} < 0$ . Thus,  $h'_{ik} \leq h_{ik} = -1, h'_{jk} \geq h_{jk} = 1$ . And we have  $h'_{ik} h'_{jk} = -1 = h_{ik} h_{jk}$ .

(2) If  $g_{ik} > 0, g_{jk} < 0$ , then  $\frac{\partial J}{\partial g_{ik}} < 0, \frac{\partial J}{\partial g_{jk}} > 0$ . Thus,  $h'_{ik} \geq h_{ik} = 1, h'_{jk} \leq h_{jk} = -1$ . And we have  $h'_{ik} h'_{jk} = -1 = h_{ik} h_{jk}$ .

(3) If  $g_{ik} < 0, g_{jk} < 0$ , then  $\frac{\partial J}{\partial g_{ik}} < 0, \frac{\partial J}{\partial g_{jk}} < 0$ . Thus  $h'_{ik} \geq h_{ik} = -1, h'_{jk} \geq h_{jk} = -1$ . So  $h'_{ik}$  and  $h'_{jk}$  may be either +1 or -1 and we have  $h'_{ik} h'_{jk} \leq 1 = h_{ik} h_{jk}$ .

(4) If  $g_{ik} > 0, g_{jk} > 0$ , then  $\frac{\partial J}{\partial g_{ik}} > 0, \frac{\partial J}{\partial g_{jk}} > 0$ . Thus  $h'_{ik} \leq h_{ik} = 1, h'_{jk} \leq h_{jk} = 1$ . So  $h'_{ik}$  and  $h'_{jk}$  may be either +1 or -1 and we have  $h'_{ik} h'_{jk} \leq 1 = h_{ik} h_{jk}$ .

**Case 2.**  $s_{ij} = 1$ . It can be proved similarly as Case 1.  $\square$

**Theorem 2.** *Loss  $L$  decreases when optimizing loss  $J(\mathbf{g})$  by the stochastic gradient descent (SGD) within each stage.*

*Proof.* The gradient of loss  $L$  w.r.t. hash codes  $\langle \mathbf{h}_i, \mathbf{h}_j \rangle$  is

$$\frac{\partial L}{\partial \langle \mathbf{h}_i, \mathbf{h}_j \rangle} = w_{ij} \alpha \left( \frac{1}{1 + \exp(-\alpha \langle \mathbf{h}_i, \mathbf{h}_j \rangle)} - s_{ij} \right). \quad (4)$$

We observe that

$$\begin{cases} \frac{\partial L}{\partial \langle \mathbf{h}_i, \mathbf{h}_j \rangle} \leq 0, & s_{ij} = 1, \\ \frac{\partial L}{\partial \langle \mathbf{h}_i, \mathbf{h}_j \rangle} \geq 0, & s_{ij} = 0. \end{cases} \quad (5)$$

By substituting Lemma 1: if  $s_{ij} = 1$ , then  $\langle \mathbf{h}'_i, \mathbf{h}'_j \rangle \geq \langle \mathbf{h}_i, \mathbf{h}_j \rangle$ , and thus  $L(\mathbf{h}'_i, \mathbf{h}'_j) \leq L(\mathbf{h}_i, \mathbf{h}_j)$ ; if  $s_{ij} = 0$ , then  $\langle \mathbf{h}'_i, \mathbf{h}'_j \rangle \leq \langle \mathbf{h}_i, \mathbf{h}_j \rangle$ , and thus  $L(\mathbf{h}'_i, \mathbf{h}'_j) \leq L(\mathbf{h}_i, \mathbf{h}_j)$ .  $\square$
